# Supplementary material for: A large and ubiquitous source of atmospheric formic acid
Source: Copernicus journal article supplement (doi:10.5194/acp-15-6283-2015), 2015-06-09
Supplement: Supplementary file 1 [file acp-15-6283-2015-supplement.pdf]

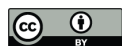

*Supplement of*

## **A large and ubiquitous source of atmospheric formic acid**

**D. B. Millet et al.**

*Correspondence to:* D. B. Millet ([dbm@umn.edu](mailto:dbm@umn.edu))

The copyright of individual parts of the supplement might differ from the CC-BY 3.0 licence.

## Supplemental Information

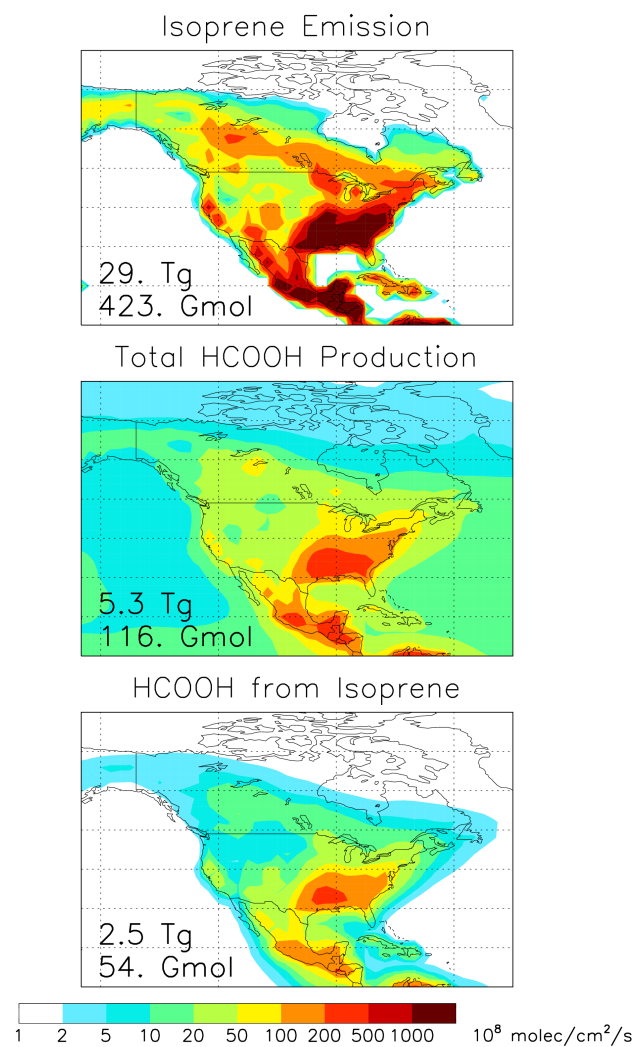

**Figure S1.** Isoprene emission, total photochemical production of HCOOH, and production of HCOOH from isoprene over North America in the GEOS-Chem base-case simulation. Note nonlinear color scale.

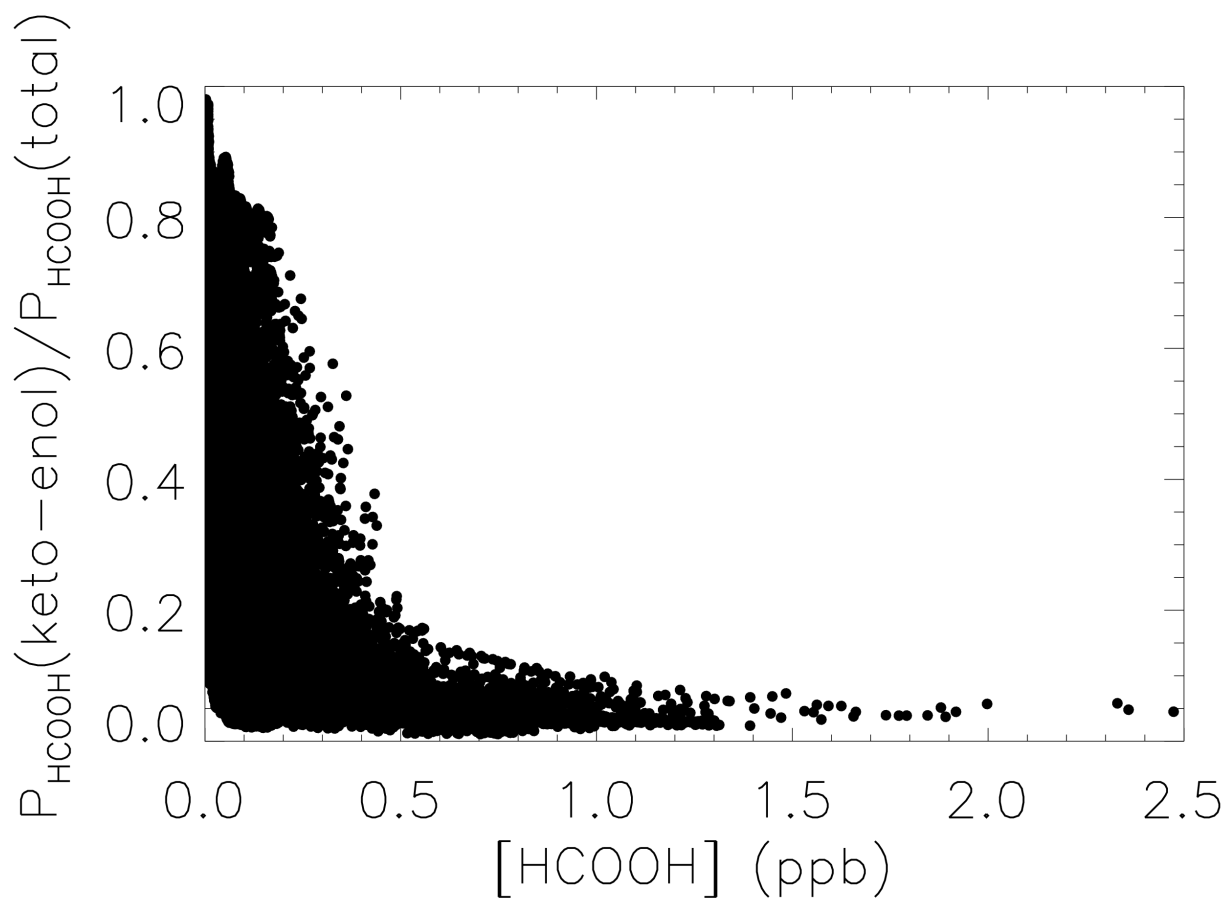

**Figure S2.** Fraction of the total photochemical HCOOH source in GEOS-Chem that is due to the keto-enol tautomerization of acetaldehyde, as a function of the HCOOH mixing ratio.

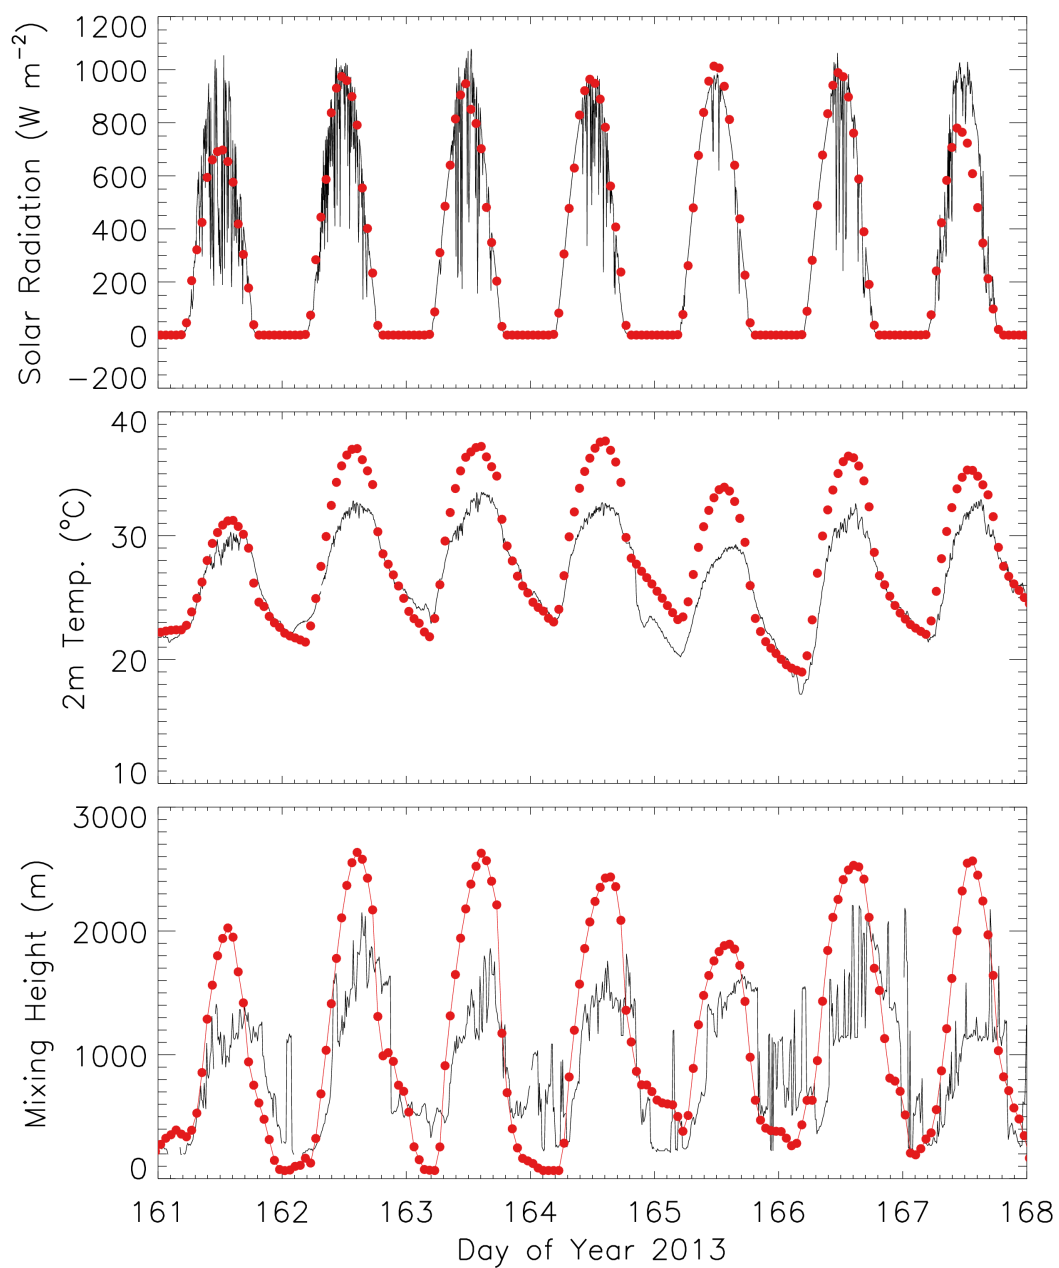

**Figure S3.** Solar radiation, air temperature, and ceilometer measurements during a subset of the SOAS campaign. Measured values (in black) are compared to the GEOS-FP values (in red) used in GEOS-Chem.

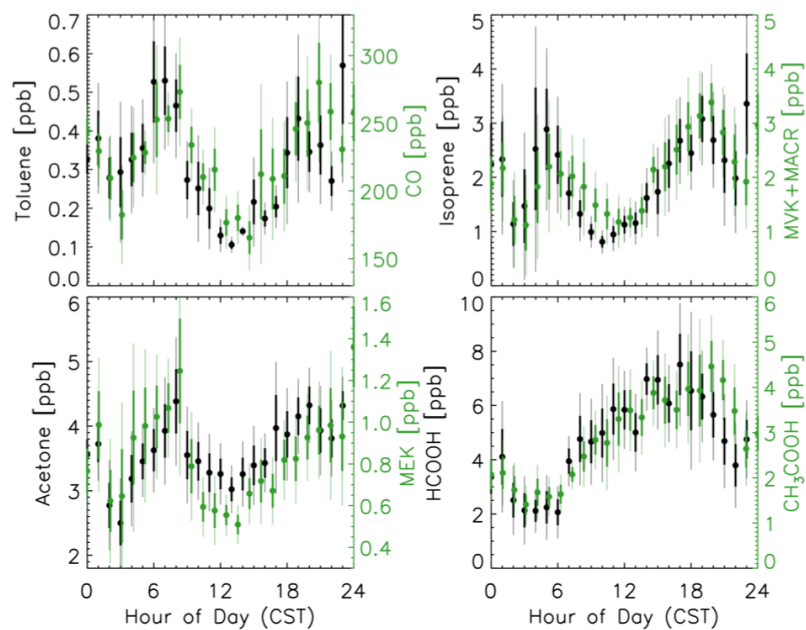

**Figure S4.** Diurnal cycle of HCOOH, CH<sub>3</sub>COOH, and related biogenic and anthropogenic compounds as measured during SLAQRS. Data shown include only non-stagnant (wind speed > 0.5 m s<sup>-1</sup>) periods with southwesterly winds (180°-270°). Error bars indicate ±1 (thick) and ±2 (thin) standard errors about the mean (points).
